# Supplementary material for: Comprehensive analysis reveals a metabolic ten-gene signature in hepatocellular carcinoma
Source: PeerJ journal article supplement (doi:10.7717/peerj.9201), 2020-05-26

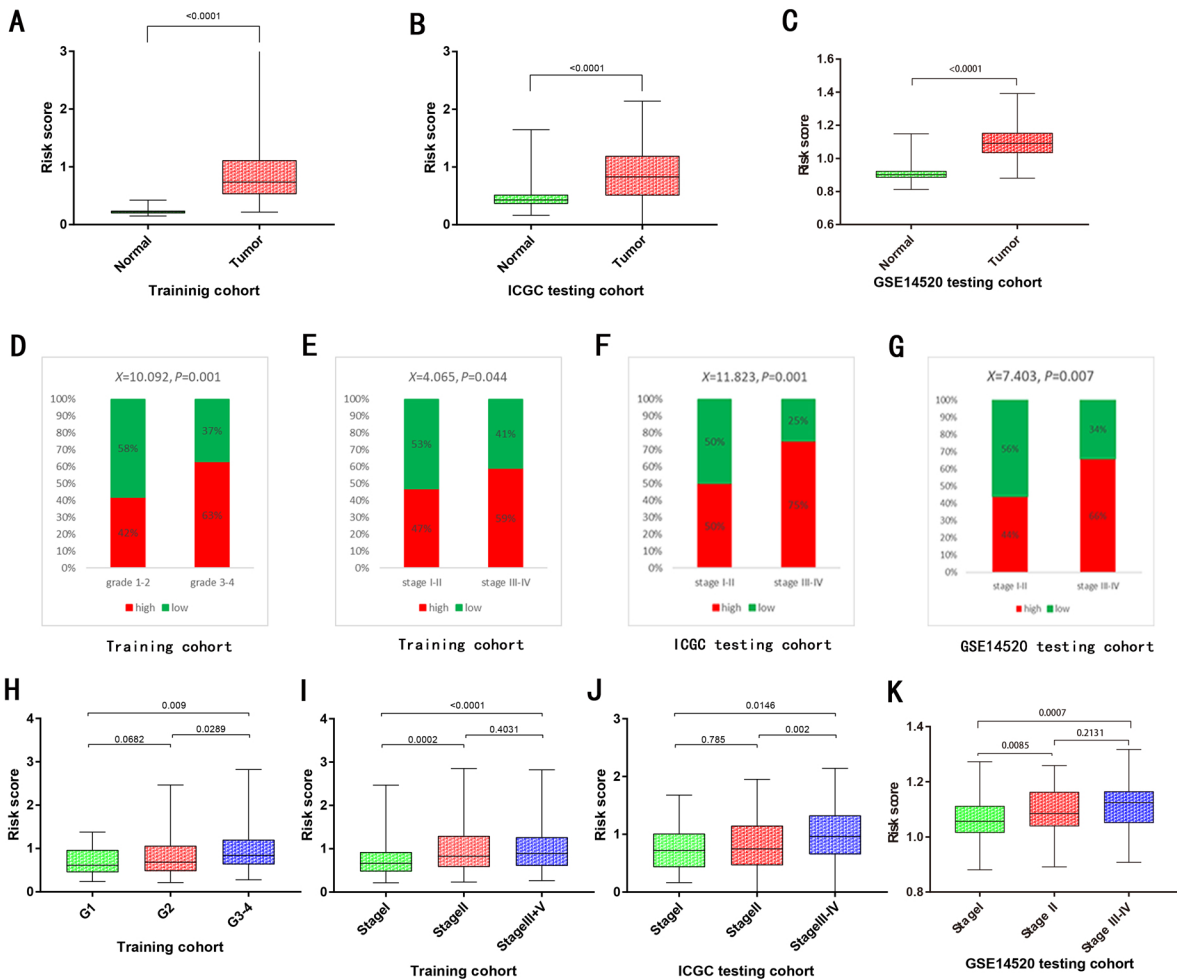

Supplement: Figure_S5.pdf [file Figure_S5.pdf]
