# Supplementary material for: Comprehensive analysis reveals a metabolic ten-gene signature in hepatocellular carcinoma
Source: PubMed Central journal article supplement (PMC7258935; doi:10.7717/peerj.9201), 2020-05-26

**A****Age<60**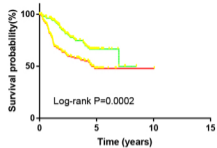**B****Age>=60**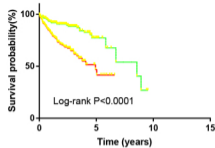**C****Male**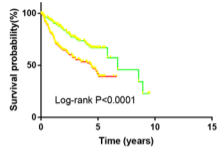**D**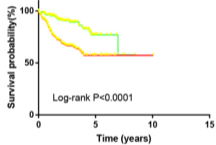**E****Stage I-II**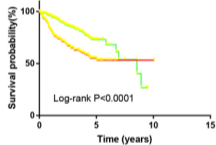**F****Stage III-IV**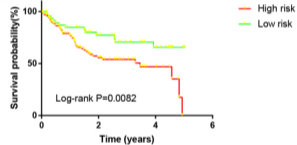**G****Stage I**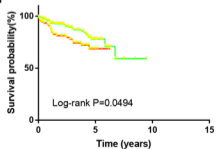**H****Stage II**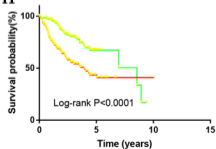**I****Stage III**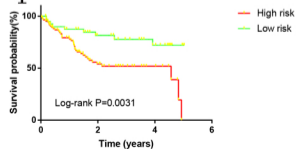

Supplement: peerj-08-9201-s007.pdf [file peerj-08-9201-s007.pdf]
