# Supplementary material for: Comprehensive analysis reveals a metabolic ten-gene signature in hepatocellular carcinoma
Source: PubMed Central journal article supplement (PMC7258935; doi:10.7717/peerj.9201), 2020-05-26

**A**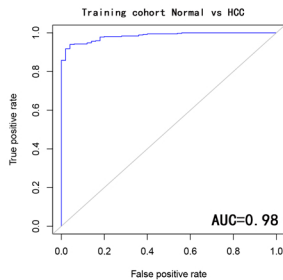**B**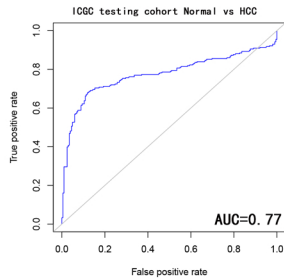**C**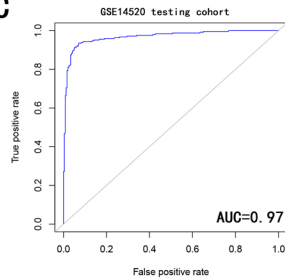**D**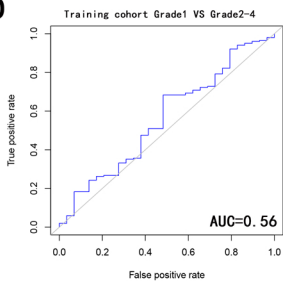**E**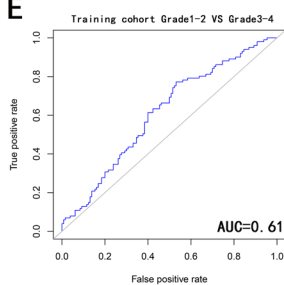**F**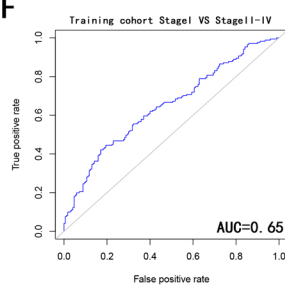**G**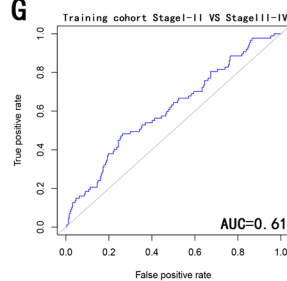**H**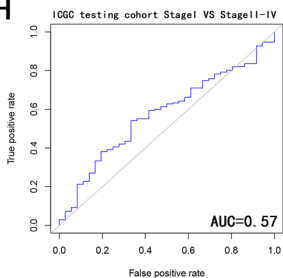**I**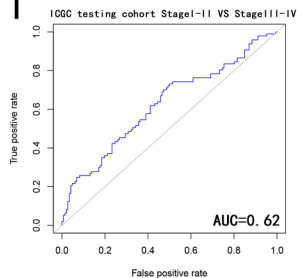**J**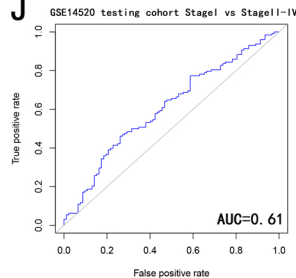**K**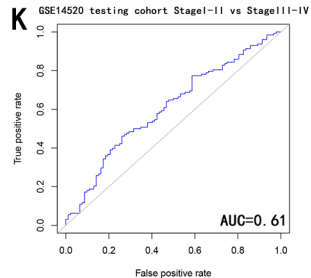

Supplement: peerj-08-9201-s010.pdf [file peerj-08-9201-s010.pdf]
